# Supplementary material for: Joint Optimization of Production and Maintenance Using Monte Carlo Method and Metaheuristic Algorithms
Source: Hindawi journal article supplement (doi:10.1155/2019/3670495), 2019-01-01
Supplement: f1 [file 3670495.f1.docx]

Table 1. Conditional expectations of 7 kinds of costs in a production cycle for each scenario. : Corrective maintenance cost. : Setup cost. : Preventive maintenance cost. : Predictive maintenance cost. : Sampling cost. : Cost of inspecting alert signals. : Shortage cost.

| Scenario |  |  |  |  |  |  |  |
| --- | --- | --- | --- | --- | --- | --- | --- |
| 1 |  |  |  |  |  |  |  |
| 2 |  |  |  |  |  |  |  |
| 3 |  |  |  |  |  |  |  |
| 4 |  |  |  |  |  |  |  |
| 5 |  |  |  |  |  |  |  |
| 6 |  |  |  |  |  |  |  |
| 7 |  |  |  |  |  |  |  |
| 8 |  |  |  |  |  |  |  |
| 9 |  |  |  |  |  |  |  |
| 10 |  |  |  |  |  |  |  |
| 11 |  |  |  |  |  |  |  |
| 12 |  |  |  |  |  |  |  |
| 13 |  |  |  |  |  |  |  |
| 14 |  |  |  |  |  |  |  |
| 15 |  |  |  |  |  |  |  |
| 16 |  |  |  |  |  |  |  |

Table 2. Conditional expectations of 2 kinds of costs in a production cycle for each scenario. : Inventory cost. : Cost for the free minimal repair warranty.

| Scenario |  |  |
| --- | --- | --- |
| 1 |  |  |
| 2 |  |  |
| 3 |  |  |
| 4 |  |  |
| 5 |  |  |
| 6 |  |  |
| 7 |  |  |
| 8 |  |  |
| 9 |  |  |
| 10 |  |  |
| 11 |  |  |
| 12 |  |  |
| 13 |  |  |
| 14 |  |  |
| 15 |  |  |
| 16 |  |  |
